# Supplementary material for: Remote Hemodynamic‐Guided Therapy of Patients With Recurrent Heart Failure Following Cardiac Resynchronization Therapy
Source: PubMed Central journal article supplement — J Am Heart Assoc. 2021 Feb 25;10(5):e017619. doi: 10.1161/JAHA.120.017619 (PMC8174266; doi:10.1161/jaha.120.017619), 2021-02-25
Supplement: JAH3-10-e017619-s001.pdf [file JAH3-10-e017619-s001.pdf]

# **SUPPLEMENTAL MATERIAL**

## Appendix

### CHAMPION Investigator Group

| Site Name                               | Investigator           |
|-----------------------------------------|------------------------|
| Northwest Texas Hospital                | Suresh B. Neelagaru    |
| Bryan LGH                               | Steven Krueger         |
| Mother Frances                          | Stan Weiner            |
| Oklahoma Heart                          | Philip Adamson         |
| Spectrum Health- Grand Rapids           | Michael Dickinson      |
| Ohio State U                            | Ayesha Hasan           |
| St. Thomas Hospital                     | Mark Aaron             |
| U of Alabama at Birmingham              | Salpy Pamboukian       |
| Northwestern Memorial Hospital          | John B. O'Connell      |
| Kennestone                              | Rajnish Prasad         |
| Moses H. Cone Memorial                  | Daniel Bensimhon       |
| Northeast GA Heart                      | Brenda Hott            |
| Intermountain                           | Dale Renlund           |
| Shands Hospital/U of FL                 | Juan Aranda            |
| U of Pennsylvania                       | Lee Goldberg           |
| Sanford USD                             | Orvar Jonsson          |
| Brigham & Women's                       | Michael Givertz        |
| Penn State Hershey                      | John Boehmer           |
| Hennepin County Medical Center          | Steven Goldsmith       |
| Springhill Medical Center               | Kenneth Burnham        |
| Albert Einstein Medical Center          | Darshak Karia          |
| University of Iowa Health Care          | Barry Cabuay           |
| Barnes Jewish Hospital                  | Gregory Ewald          |
| OSF Saint Francis Medical Center        | Barry Clemson          |
| Methodist Hospital                      | Guillermo Torre-Amione |
| University of Pittsburgh Medical Center | Michael Mathier        |
| California Pacific Medical Center       | Ernest Haeusslein      |
| Edwards Hospital                        | Maria Constanzo        |
| USC University Hospital                 | Leonardo Clavijo       |
| Henry Ford Hospital                     | Barbara Czerska        |
| Emory University Hospital               | Andrew Smith           |
| Columbia Presbyterian                   | Donna Mancini          |
| Advocate Christ Medical Center          | Marc Silver            |
| Scripps                                 | J. Thomas Heywood      |
| Piedmont Hospital                       | Raval/ Vivek Rajagopal |
| Alexian Brothers                        | G. Martin Mullen       |
| Lehigh Valley- Allentown                | Ronald Freudenberger   |
| Geisinger                               | Henry Fesniak          |
| St. Joseph's of Atlanta                 | Nick Chronos           |
| U of Minnesota                          | Andrew Boyle           |
| Holy Cross Hospital                     | Alan Niederman         |
| Huntsville Hospital                     | Warren Strickland      |

|                                                       |                  |
|-------------------------------------------------------|------------------|
| Orlando Regional                                      | Barry Weinstock  |
| Mercy                                                 | Javier Jimenez   |
| Harbor-UCLA Med Center                                | David Shavelle   |
| Via Christi Healthcare System                         | Darrell Youngman |
| Washington Adventist Hospital                         | Fayaz Shawl      |
| Baptist Health - Princeton                            | Alain Bouchard   |
| Med Center of Central Georgia                         | Mark Dorogy      |
| Providence Hospital                                   | Charles Parrott  |
| Wake Med                                              | J. Tift Mann     |
| Trinity Medical Center                                | Tom Eagan        |
| Carolinas Medical Center                              | Theodore Frank   |
| Sharp Memorial                                        | Brian Jaski      |
| Swedish Heart and Vascular Clinic                     | Mark Reisman     |
| Good Samaritan-Los Angeles, CA                        | David Shavelle   |
| Baptist Memorial Hospital-Memphis                     | Ed Garrett       |
| Good Samaritan-Dayton                                 | Eugene Simoni    |
| Washington Hospital                                   | Ron Waksman      |
| Allegheny                                             | Raymond Benza    |
| Lancaster Heart                                       | Roy Small        |
| Lynchburg General Hospital at Cenra                   | Thomas Nygaard   |
| North Mississippi                                     | Barry Bertolet   |
| St. Luke's Episcopal Hospital & Texas Heart Institute | Pranav Loyalka   |

**Table S1. Descriptive Statistics on Number of HF Hospitalizations.**

| Randomization | N  | Mean | Std Dev | Minimum | Maximum |
|---------------|----|------|---------|---------|---------|
| CONTROL       | 99 | 0.9  | 1.4     | 0.0     | 6.0     |
| TREATMENT     | 91 | 0.7  | 1.0     | 0.0     | 5.0     |

**Frequency of HF Hospitalizations**

| Table of HF Hospitalizations by Randomization |                               |           |       |
|-----------------------------------------------|-------------------------------|-----------|-------|
| HF Hospitalizations                           | Randomization (Randomization) |           |       |
|                                               | CONTROL                       | TREATMENT | Total |
| 0                                             | 54                            | 52        | 106   |
| 1                                             | 21                            | 22        | 43    |
| 2                                             | 13                            | 14        | 27    |
| 3                                             | 4                             | 1         | 5     |
| 4                                             | 3                             | 1         | 4     |
| 5                                             | 2                             | 1         | 3     |
| 6                                             | 2                             | 0         | 2     |
| <b>Total</b>                                  | 99                            | 91        | 190   |

**Table S2. Baseline Dosing of GDMT in Patients with CRT Enrolled in CHAMPION Trial.**

| HF Drug Class             | Drug                                               | Treatment Group<br>(n = 91) |                         | Control Group<br>(n = 99) |                         | Analysis    |             |
|---------------------------|----------------------------------------------------|-----------------------------|-------------------------|---------------------------|-------------------------|-------------|-------------|
|                           |                                                    | No. (%)                     | Total Daily Dose,<br>mg | No. (%)                   | Total Daily<br>Dose, mg | P<br>Value* | P<br>Value† |
| Diuretic                  | Loop diuretic                                      | 84 (92)                     | 94                      | 96 (97)                   | 110                     | 0.1988      | 0.2737      |
|                           | Thiazide diuretic                                  | 12 (13)                     | 4                       | 7 (7)                     | 5                       | 0.2260      | 0.2109      |
|                           | Thiazide diuretic PRN                              | 8 (9)                       | 3                       | 10 (10)                   | 4                       | 0.8085      | 0.5891      |
| Vasodilator               | Nitrate                                            | 22 (24)                     | 62                      | 18 (18)                   | 64                      | 0.3740      | 0.9328      |
|                           | Hydralazine                                        | 7 (8)                       | 119                     | 9 (9)                     | 69                      | 0.7979      | 0.4557      |
| Neuro-hormonal antagonist | ACE/ARB (enalapril equivalent)                     | 69 (76)                     | 20                      | 84 (85)                   | 19                      | 0.1430      | 0.5432      |
|                           | Beta blocker (carvedilol equivalent)               | 83 (91)                     | 32                      | 90 (91)                   | 36                      | 1.0000      | 0.9502      |
|                           | Aldosterone antagonist (spironolactone equivalent) | 35 (38)                     | 26                      | 43 (43)                   | 30                      | 0.5554      | 0.4913      |

\* P-value testing Treatment vs Control prevalence obtained from Fisher's exact test.

† P-value testing Treatment vs Control total daily dose obtained from exact Wilcoxon rank-sum test.

ACE/ARB, angiotensin converting enzyme/angiotensin receptor blocker; CRT, cardiac resynchronization therapy; GDMT, guideline-directed medical therapy; HF, heart failure; PRN, Latin term "as needed."

**Table S3. Total Number of Medication Changes in CRT Patients Enrolled in CHAMPION**

**Trial\*.**

| <b>Group</b>              | <b>Drug Category</b> | <b>Dosage Increase</b> | <b>Dosage Decrease</b> | <b>Total Changes</b> |
|---------------------------|----------------------|------------------------|------------------------|----------------------|
| <b>CONTROL<br/>N=99</b>   | Diuretics            | 132                    | 71                     | 203                  |
|                           | Vasodilators         | 21                     | 1                      | 22                   |
|                           | ACE-I/ARB            | 25                     | 17                     | 42                   |
|                           | Beta-blocker         | 33                     | 21                     | 54                   |
|                           | MRA                  | 22                     | 3                      | 25                   |
|                           | <b>Total †</b>       | <b>233</b>             | <b>113</b>             | <b>346</b>           |
| <b>TREATMENT<br/>N=91</b> | Diuretics            | 299                    | 198                    | 497                  |
|                           | Vasodilators         | 103                    | 22                     | 125                  |
|                           | ACE-I/ARB            | 60                     | 41                     | 101                  |
|                           | Beta-blocker         | 51                     | 34                     | 85                   |
|                           | MRA                  | 31                     | 8                      | 39                   |
|                           | <b>Total †</b>       | <b>544</b>             | <b>303</b>             | <b>847</b>           |

\* Medication changes were recorded for each patient during the first 6 months of randomized access.

† *P*-value testing Treatment vs Control for total medication change dosage increase frequencies ( $p < 0.001$ ) and dosage decrease frequencies ( $p < 0.001$ ) from Poisson means test.

Abbreviations: ACE-I/ARB, angiotensin converting enzyme/angiotensin receptor blocker; MRA, mineralocorticoid receptor antagonist. Vasodilators included nitrates and hydralazine. Dosing changes that did not result in a change in bioavailability of the drug are not included.
